# Supplementary material for: Effective UV-protection and photovoltaic efficiency enhancement of polymer solar cells using diatom shells doped with Eu3+/Tb3+complexes
Source: Royal Society of Chemistry journal article supplement (doi:10.1039/d4ta03383c), 2024-01-01
Supplement: d4ta03383c1.pdf [file d4ta03383c1.pdf]

## Support information

### Effective UV-protection and photovoltaic efficiency enhancement of $\text{Eu}^{3+}/\text{Tb}^{3+}$ -complex doped diatom shells for polymer solar cells

Tonghui Li, Wenfei Shen, Zaixin Long, Yanying Zhang, Yao Wang, Wei Wang, Zhonglin Du, Jiuxing Wang, Laurence A. Belfiore, Olle Inganäs, Jianguo Tang\*

<sup>a</sup> Institute of Hybrid Materials, National Center of International Research for Hybrid Materials Technology, National Base of International Science & Technology Cooperation, College of Materials Science and Engineering, Qingdao University, Qingdao, 266071, P. R. China.

<sup>b</sup> Biomolecular and Organic Electronics, Department of Physics, Chemistry and Biology (IFM), Linköping University, SE-581 83, Linköping, Sweden.

\*Corresponding author: Jianguo Tang, email: [tang@qdu.edu.cn](mailto:tang@qdu.edu.cn)

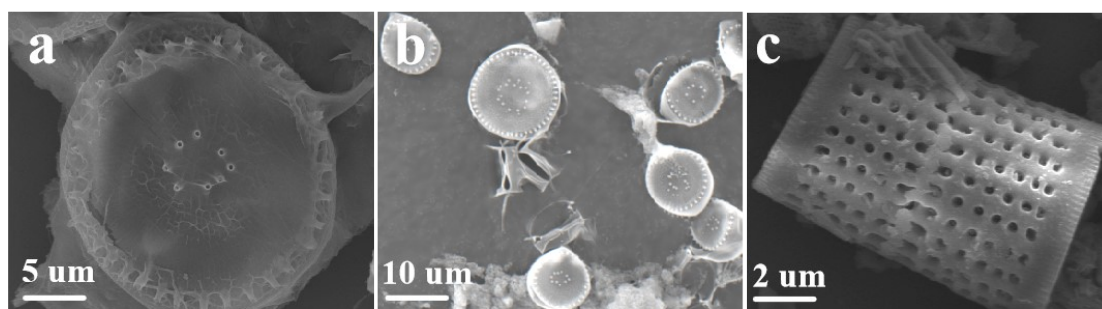

**Figure S1** SEM images of the bottom of sea streptococcus *Streptomyces wilsoni* (a) and (b), SEM images of diatom shells (c).

| LDT | Elemental content (wt%) |       |       |       |      |     |      |      |
|-----|-------------------------|-------|-------|-------|------|-----|------|------|
|     | C                       | O     | Si    | N     | P    | Fe  | Ca   | Al   |
|     | 56.64                   | 26.17 | 23.60 | 12.48 | 0.17 | 0.1 | 0.19 | 0.35 |

**Table S1** The EDS element composition of living diatoms (C, O, Si, N, P, Fe, Ca, Al).

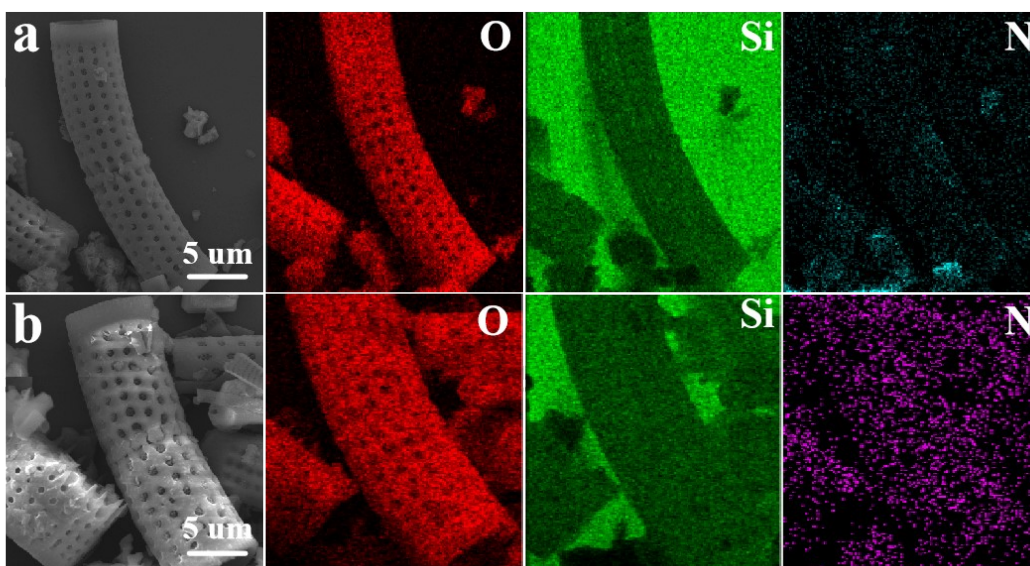

**Figure S2** The X-ray spectrum (EDS) of the diatom shell (a), and the X-ray spectrum (EDS) of the grafted diatom shell (b).

| Sample   | Elemental content (wt%) |       |       |       |
|----------|-------------------------|-------|-------|-------|
|          | O                       | Si    | N     | C     |
| DS       | 59.81                   | 29.98 | 4.71  | 7.16  |
| DS-APTMS | 21.77                   | 7.83  | 18.52 | 51.47 |

**Table S2** The EDS element composition of DS-APTMS and DS (O, Si, N, C).

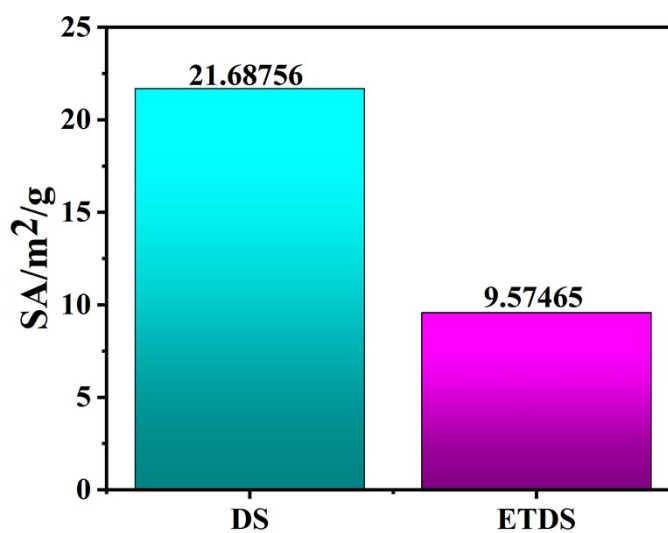

**Figure S3** The specific surface area (SA) plot of the DS and ETDS (b).

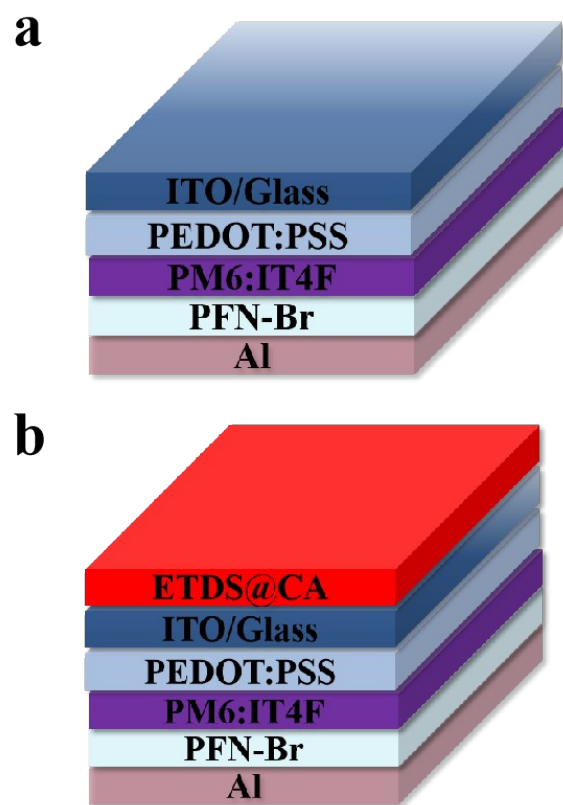

**Figure S4** Image of the original cell device (a), and the image of the optimized cell device (b).

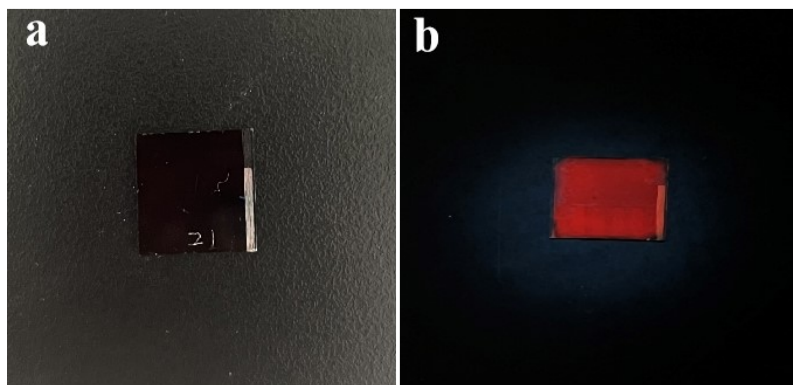

**Figure S5** UV irradiation ETDS@CA spin coating to the device image (a) and (b).

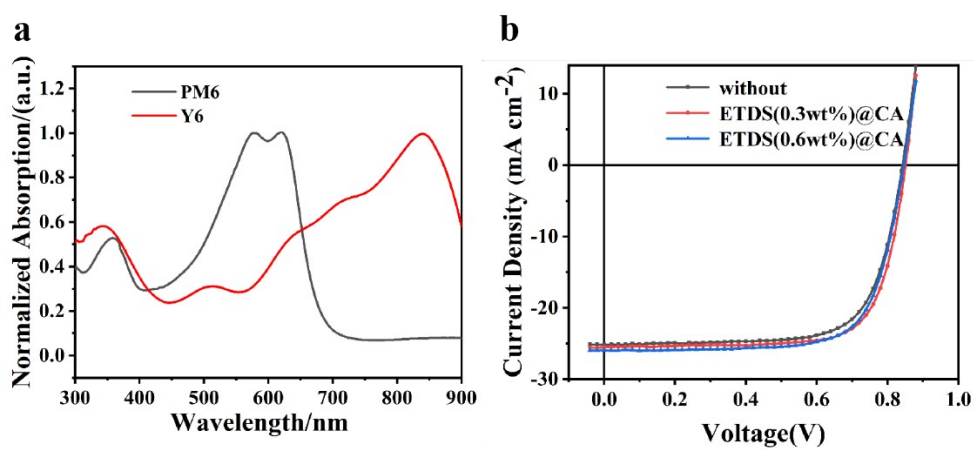

**Figure S6** The film normalisation curves for PM6 and Y6 (a), and the J-V diagram of the rotary-coated ETDS@CA and original cells (b).
